## CORRECTION

# An essential role for LPA signalling in telencephalon development

**Timothy J. Geach, Laura Faas, Christelle Devader, Anai Gonzalez-Cordero, Jacqueline M. Tabler, Hannah Brunson, Harry V. Isaacs and Leslie Dale**

There was an error published in *Development* **141**, 940-949.

Supplementary figures S3, S4 and S5 were incorrect and have been replaced.

The authors apologise to readers for this mistake.
